# Supplementary material for: Lead-free iron-doped Cs3Bi2Br9 perovskite with tunable properties
Source: Royal Society of Chemistry journal article supplement (doi:10.1039/d4ra04062g), 2024-01-01
Supplement: d4ra04062g1.pdf [file d4ra04062g1.pdf]

## Supporting Information

### Lead-free Iron-doped $\text{Cs}_3\text{Bi}_2\text{Br}_9$ Perovskite with Tunable Properties

Thiri Htun,<sup>\*a</sup> Amr Elattar,<sup>bc</sup> Hytham Elbohy,<sup>d</sup> Kosei Tsutsumi,<sup>a</sup> Kazumasa Horigane,<sup>e</sup> Chiyu Nakano,<sup>f</sup> Xiaoyu Gu,<sup>g</sup> Hiroo Suzuki,<sup>a</sup> Takeshi Nishikawa,<sup>a</sup> Aung Ko Ko Kyaw, <sup>\*g</sup> and Yasuhiko Hayashi<sup>\*a</sup>

<sup>a</sup>Graduate School of Natural Science and Technology, Okayama University, Japan. Email: hayashi.yasuhiko@ec.okayama-u.ac.jp

<sup>b</sup>Department of Chemistry, Faculty of Science, Ain Shams University, Cairo, Egypt.

<sup>c</sup>Industrial & Manufacturing Engineering, FAMU-FSU College of Engineering, 2525 Pottsdamer St., Tallahassee, Florida, 32310, United States.

<sup>d</sup>Physics Department, Faculty of Science, Damietta University, Egypt.

<sup>e</sup>Research Institute for Interdisciplinary Science, Okayama University, Japan.

<sup>f</sup>Advanced Science Research Center, Okayama University, Okayama, Japan.

<sup>g</sup>Guangdong University Key Laboratory for Advanced Quantum Dot Displays and Lighting, and Department of Electronic & Electrical Engineering, Southern University of Science and Technology, P. R. China. Email: aung@sustech.edu.cn

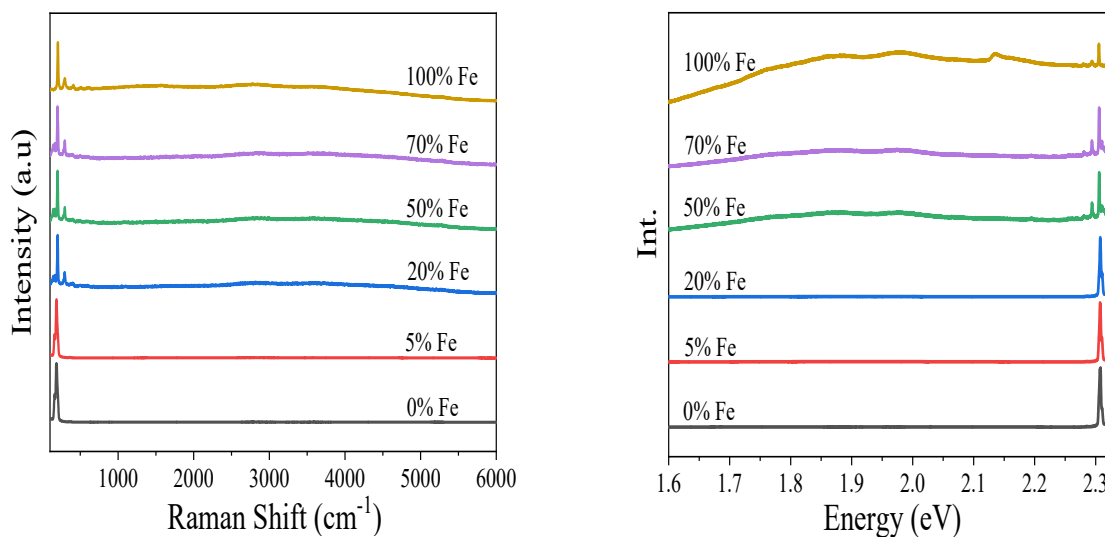

Fig. S1 (a) Raman spectra of the pristine  $\text{Cs}_3\text{Bi}_2\text{Br}_9$  and Fe doped perovskite crystals in the range of 50-6000  $\text{cm}^{-1}$ . (b) Energy of different Cu-alloyed perovskite crystals in the range of 1.6-2.3 eV.

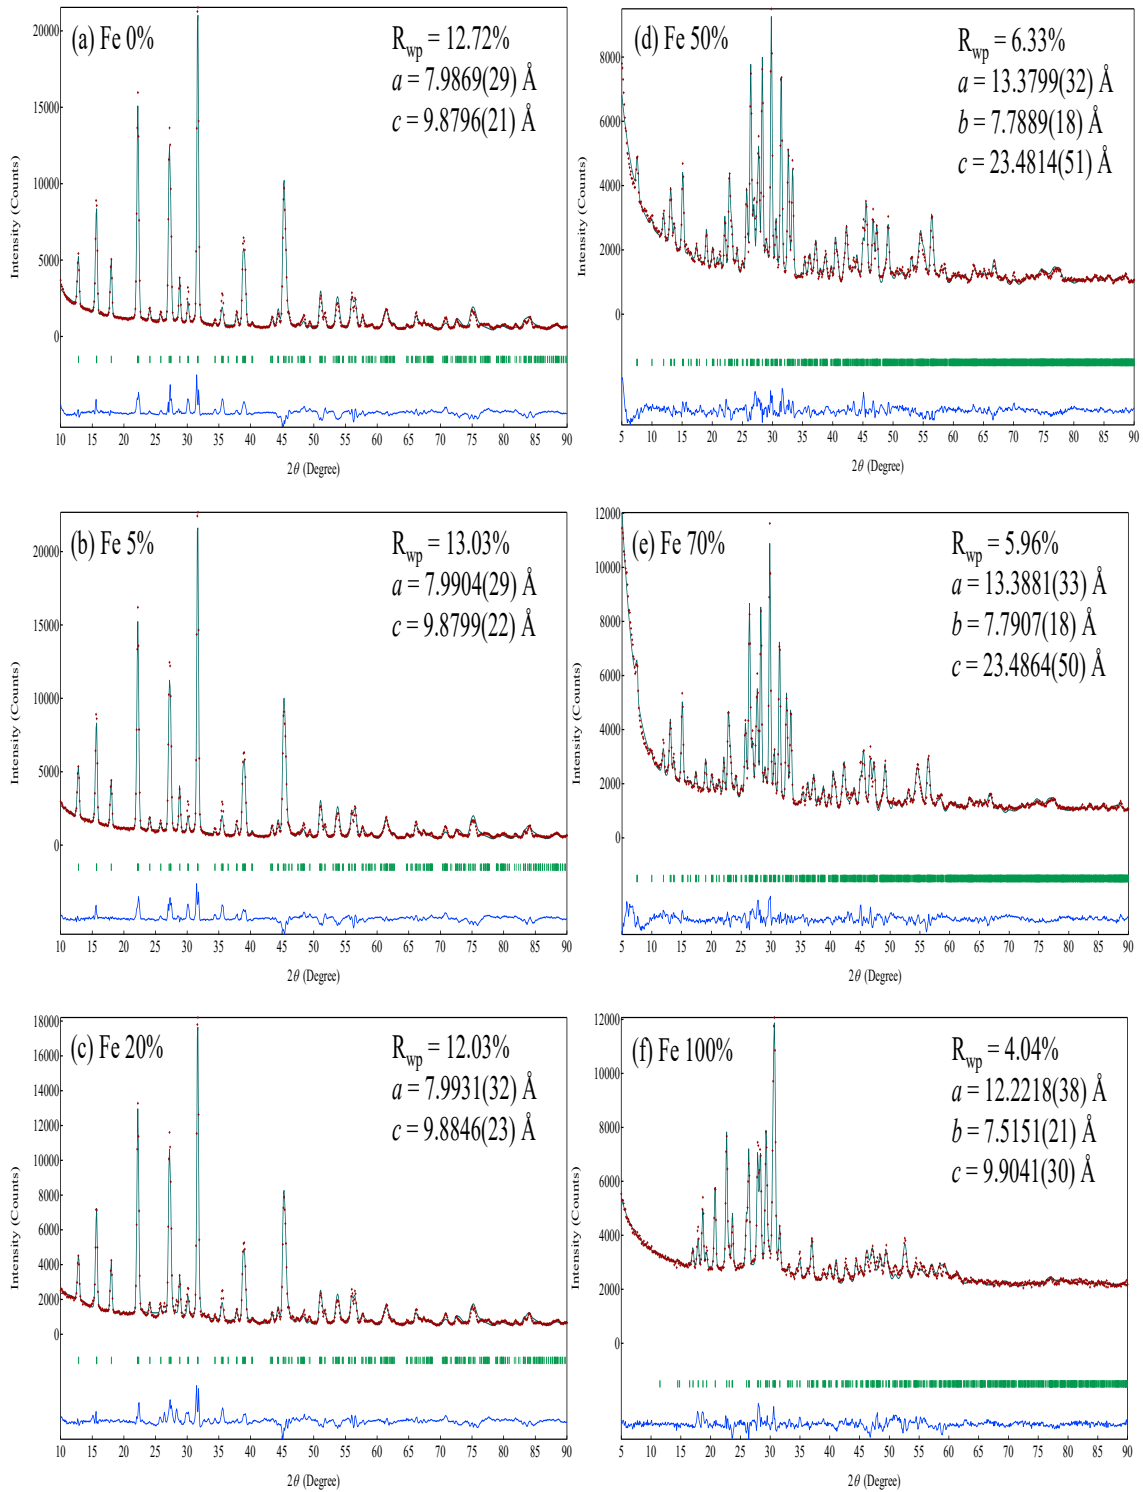

Fig. S2. Rietveld refined XRD patterns of Fe doping samples based on the (a-c)  $\text{Cs}_3\text{Bi}_2\text{Br}_9$  structure with P-3m1, (d-e)  $\text{Cs}_2(\text{Bi,Fe})\text{Br}_5$  structure with Pnma and (f)  $\text{CsFeBr}_4$  structure with Pnma.

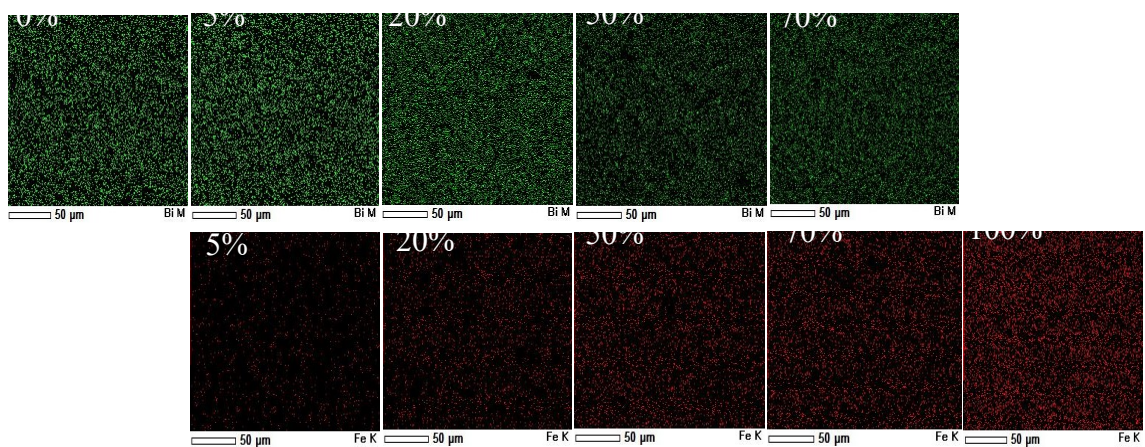

Fig. S3. Energy Dispersive Scanning (EDS) elemental mapping for Bi (Green) and Fe (Red).
